# Supplementary material for: One-year, regional-scale simulation of 137 Cs radioactivity in the ocean following the Fukushima Dai-ichi Nuclear Power Plant accident
Source: Copernicus journal article supplement (doi:10.5194/bg-10-5601-2013), 2013-08-23
Supplement: Supplementary file 1 [file bg-10-5601-2013-supplement.pdf]

Supplimentary infromations

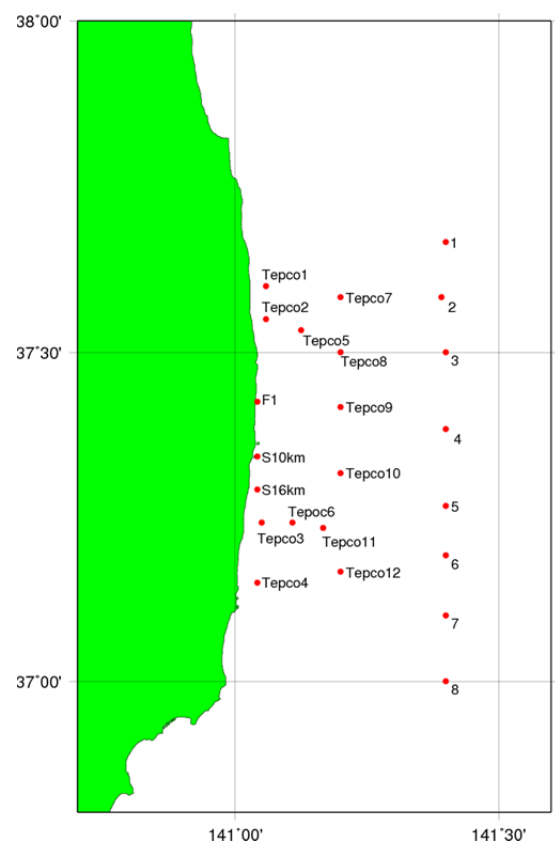

S-Fig. 1. Measuring points near shore

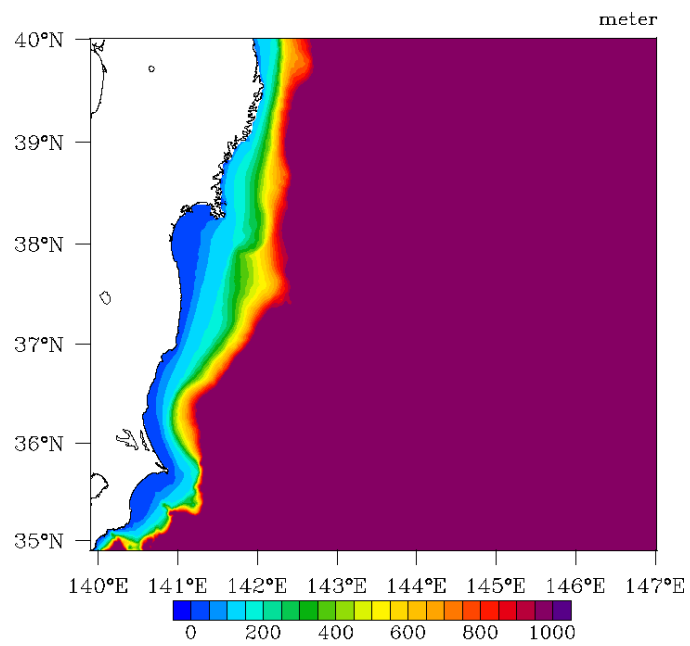

**S-Fig. 2.** Bottom topography in a Regional Ocean Model System. Maximum depth was set at 1000m in this model.

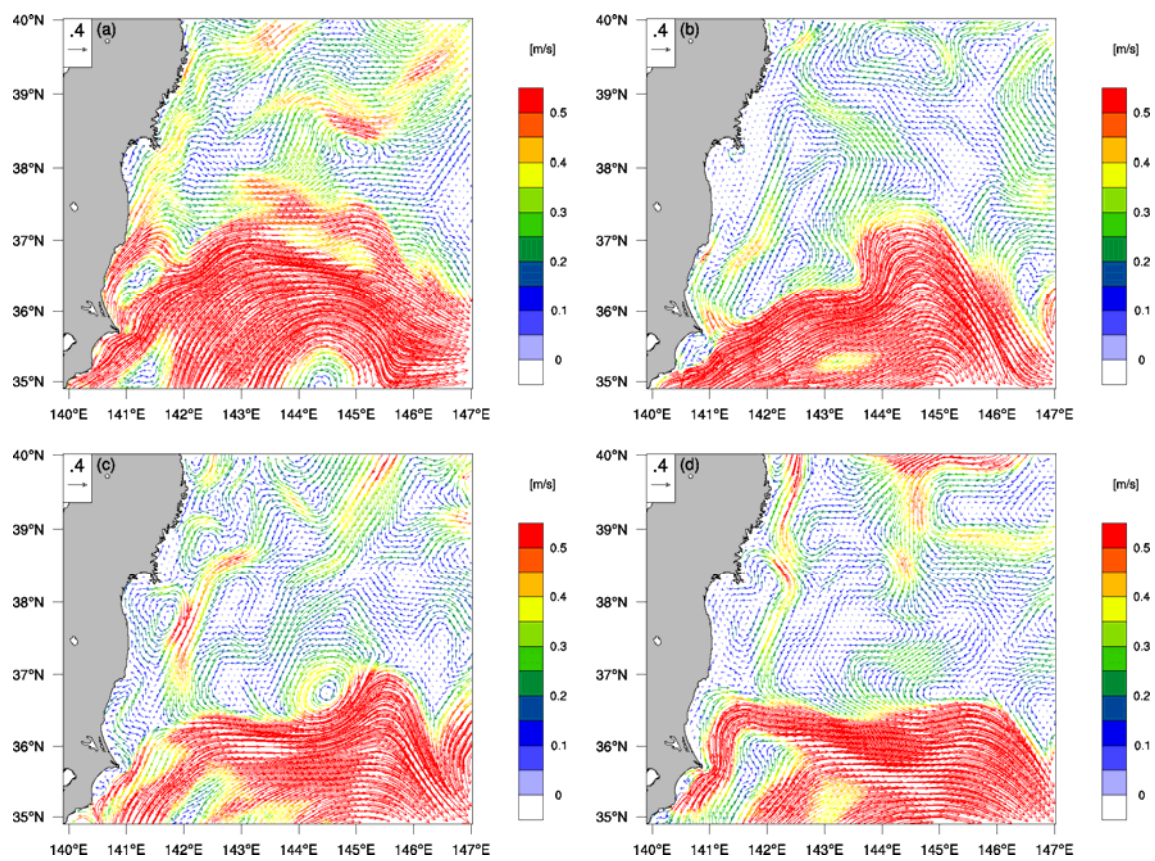

**S-Fig. 3.** Simulated current field ( $\text{m s}^{-1}$ ) on (a) 1 May, (b) 1 June, (c) 15 June, and (d) 1 July 2011.

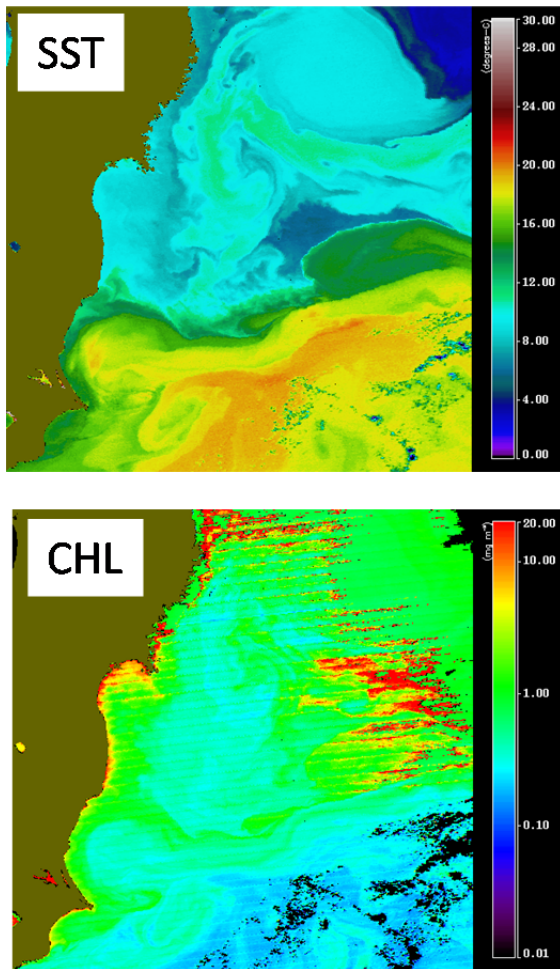

**S-Fig. 4.** Satellite image of sea surface temperature and chlorophyll a concentration at 14 April 2011.

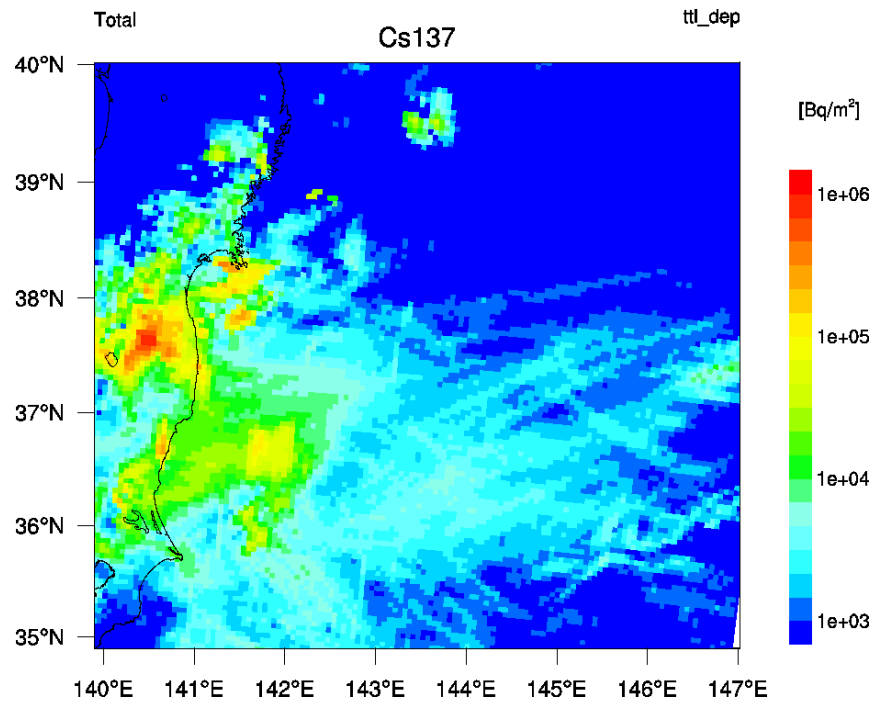

**S-Fig. 5.** Cumulative atmospheric wet and dry deposition of <sup>137</sup>Cs activity (Bq m<sup>-2</sup>) from 11 March to 1 April 2011

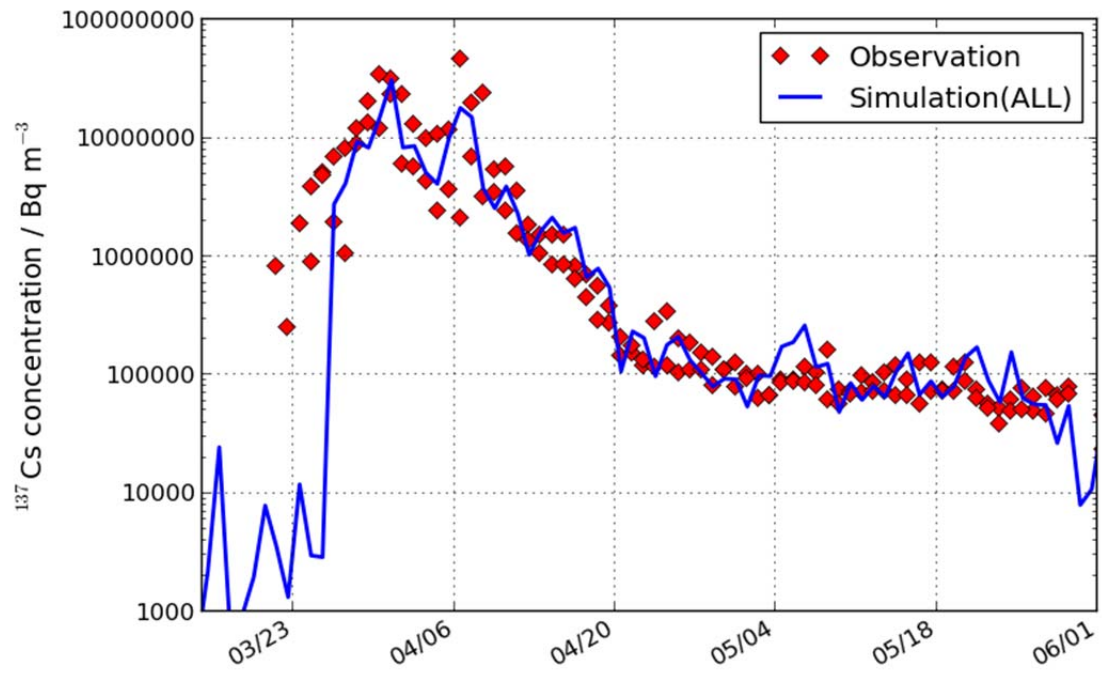

**S-Fig. 6.** Daily mean measured  $^{137}\text{Cs}$  activities ( $\text{Bq m}^{-3}$ ) at the 5-6 and south discharge canals and simulated activities (ALL scenario) adjacent to the 1F NPP.

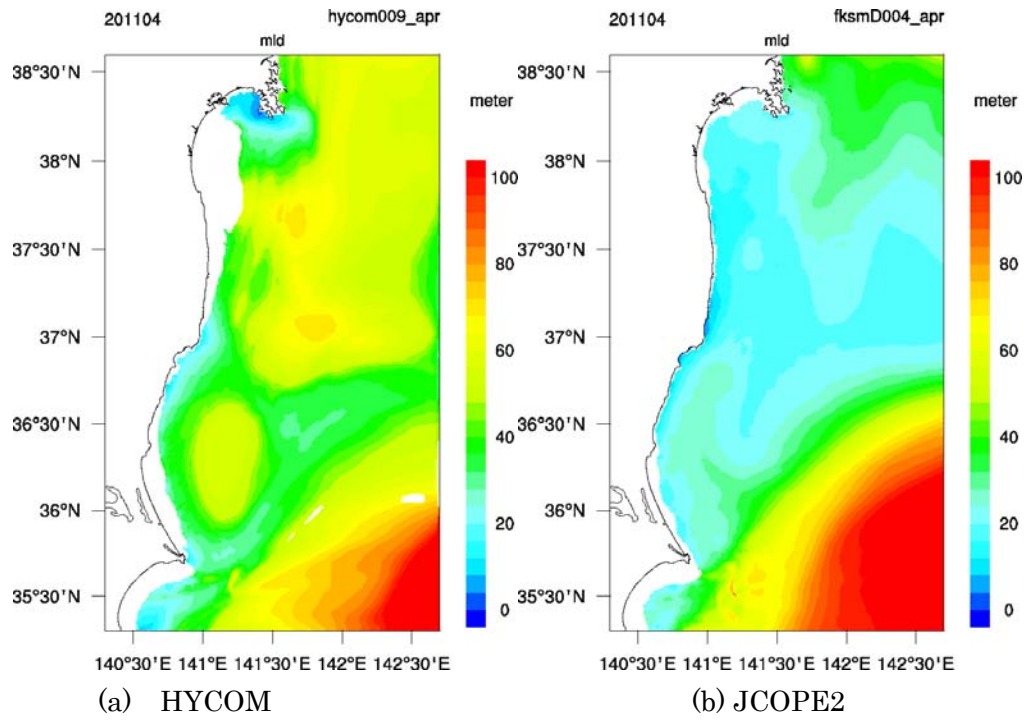

**S-Fig. 7.** Simulated mixed layer depth (monthly averaged on April 2011)

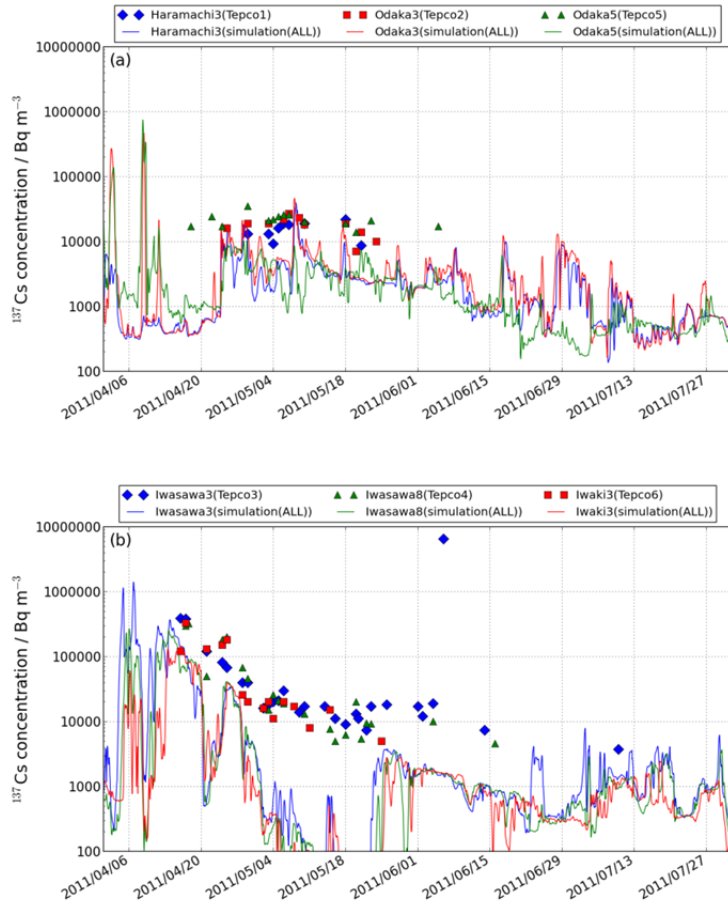

**S-Fig. 8.** (a) Measured  $^{137}\text{Cs}$  activities ( $\text{Bq m}^{-3}$ ) and simulated  $^{137}\text{Cs}$  activities (ALL scenario) at 3-8 km offshore at the north and (b) at the south. (c) Scatter plot between daily mean measured activities and simulated activities.



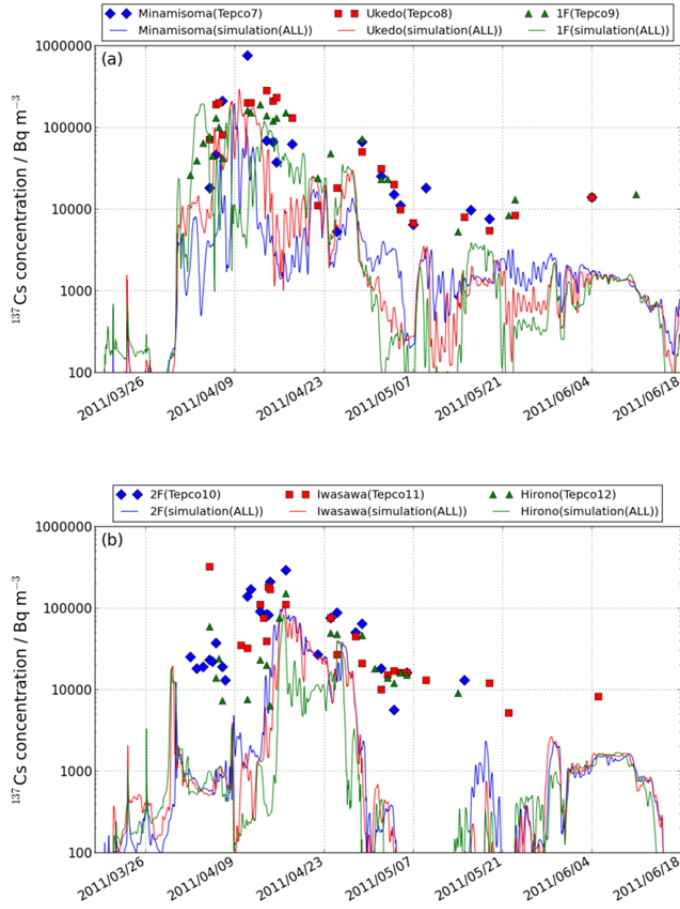

**S-Fig. 9.** (a) Measured  $^{137}\text{Cs}$  activities ( $\text{Bq m}^{-3}$ ) and simulated  $^{137}\text{Cs}$  activities (ALL scenario) at 15 km offshore at the north and (b) at the south. (c) Scatter plot between daily mean measured activities and simulated activities.

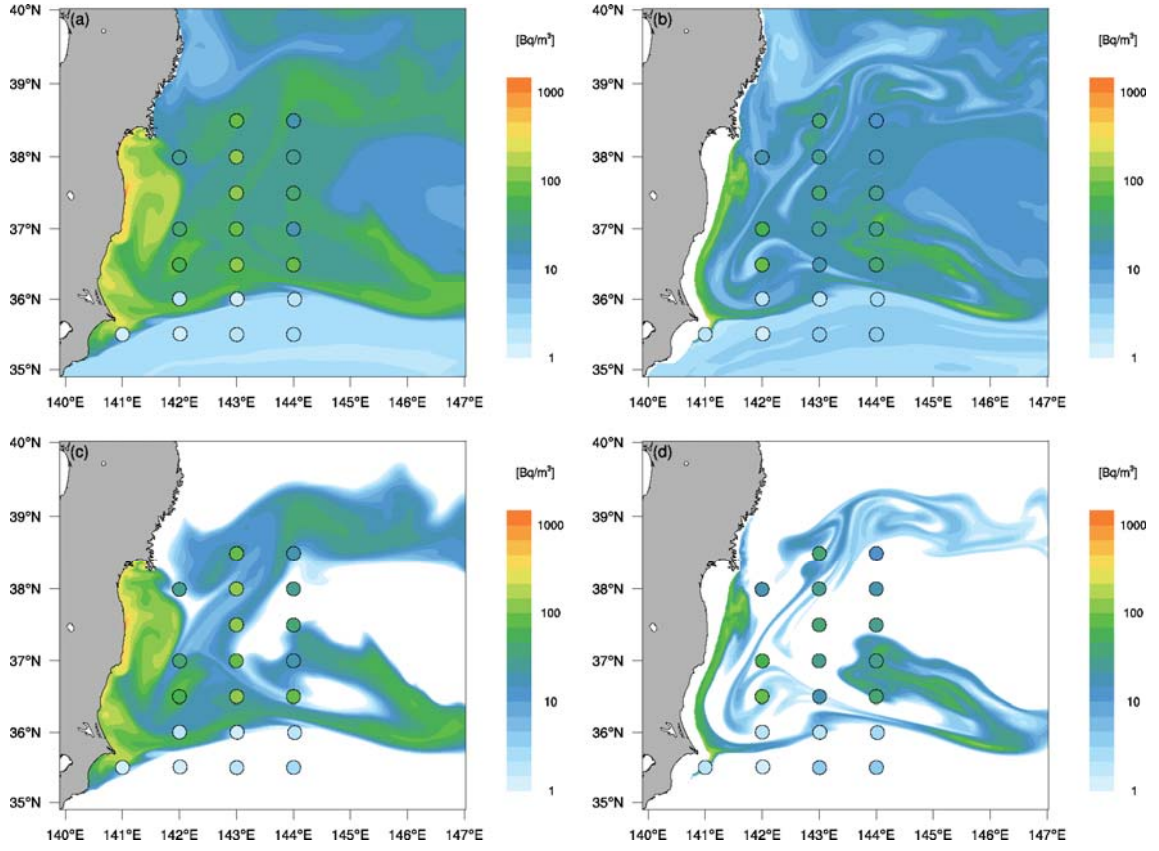

**S-Fig. 10.** Simulated  $^{137}\text{Cs}$  activities (Bq m $^{-3}$ ) (ALL case) on 25 August 2011 (a) in surface waters and (b) at a depth of 100 m and measurements from 23–27 August 2011. Simulated  $^{137}\text{Cs}$  activities (D\_RELEASE scenario) (c) in surface waters and (d) at a depth of 100 m.

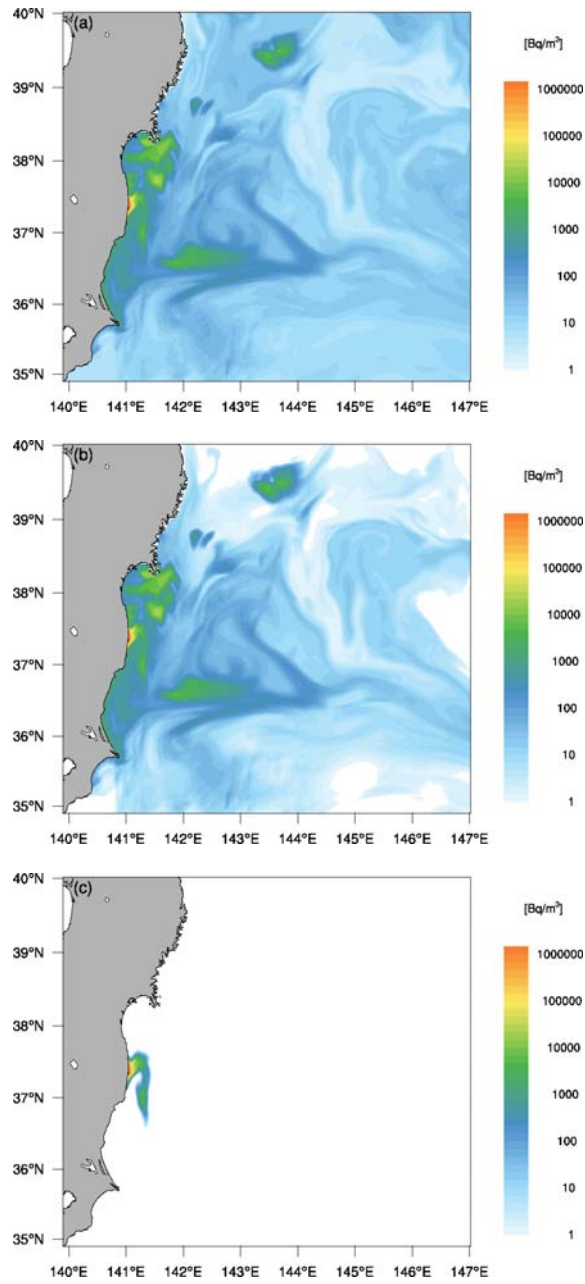

**S-Fig. 11** Simulated  $^{137}\text{Cs}$  activities ( $\text{Bq m}^{-3}$ ) in surface waters at 1 April 2011 ((a) ALL scenario, (b) NO\_INFLOW scenario, and (c) D\_RELEASE scenario)

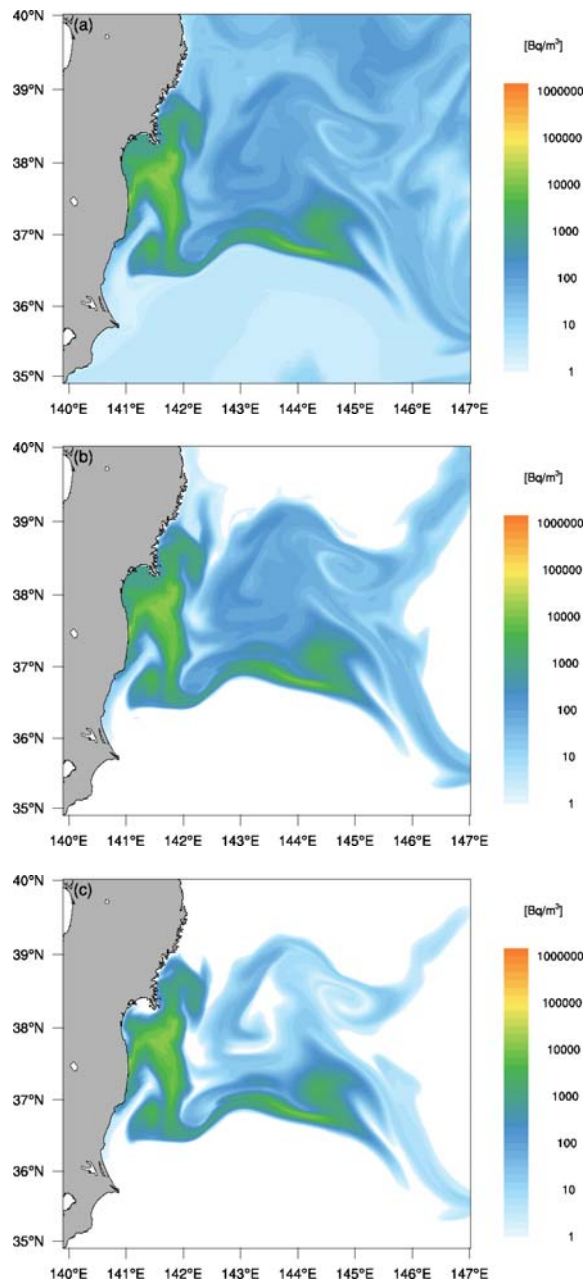

**S-Fig. 12** Simulated  $^{137}\text{Cs}$  activities ( $\text{Bq m}^{-3}$ ) in surface waters at 1 May 2011 ((a) ALL scenario, (b) NO\_INFLOW scenario, and (c) D\_RELEASE scenario)

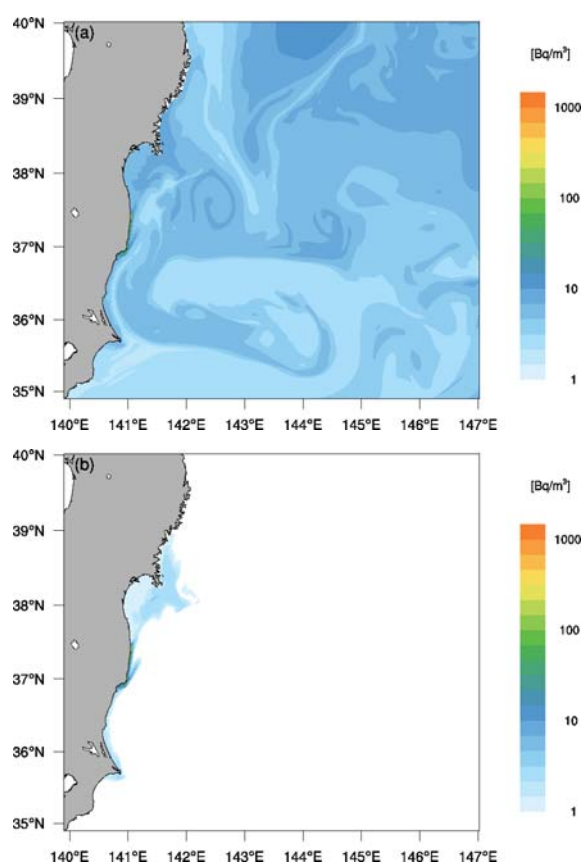

**S-Fig. 13** Simulated  $^{137}\text{Cs}$  activities ( $\text{Bq m}^{-3}$ ) in surface waters at 29 February 2011 ((a) ALL scenario, and (b) D\_RELEASE scenario)

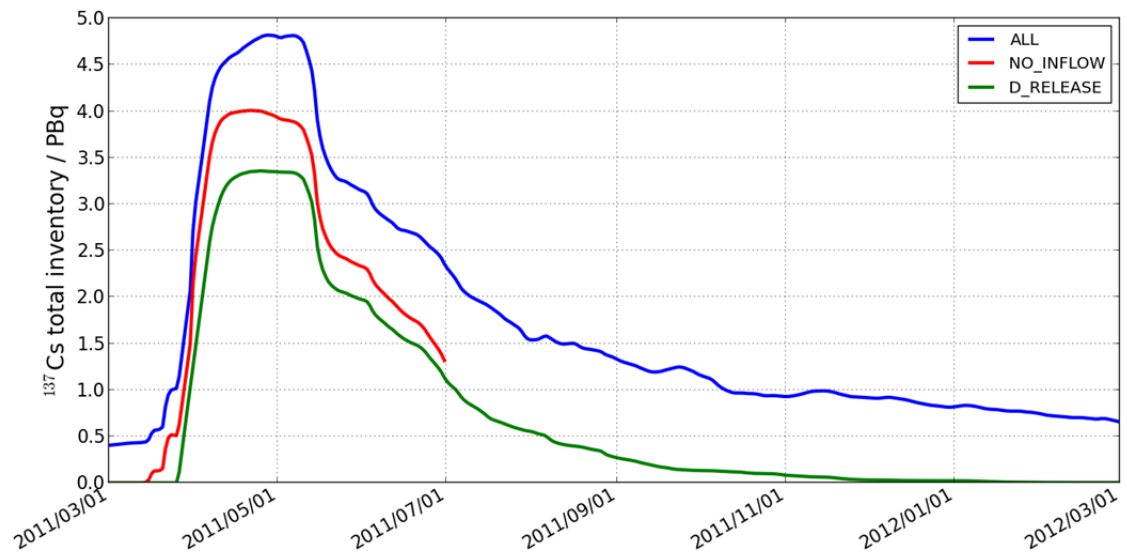

**S-Fig. 14** Simulated total inventories of  $^{137}\text{Cs}$  activities (PBq) in a model domain for ALL scenario, NO\_INFLOW scenario, and D\_RELEASE scenario
